# Supplementary material for: Wound healing mechanism of antimicrobial peptide cathelicidin-DM
Source: Frontiers journal article supplement (doi:10.3389/fbioe.2022.977159), 2022-11-07
Supplement: Data_Sheet_1.pdf [file Data_Sheet_1.pdf]

## Supplementary Material

### 1 Supplementary Figures

A

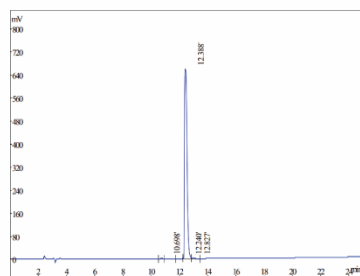

| Rank  | Time   | Conc.   | Area    | Height |
|-------|--------|---------|---------|--------|
| 1     | 10.698 | 0.3252  | 24381   | 3306   |
| 2     | 12.240 | 0.09903 | 7425    | 1910   |
| 3     | 12.388 | 99.3    | 7444953 | 657787 |
| 4     | 12.827 | 0.2778  | 20827   | 3034   |
| Total |        | 100     | 7497586 | 666037 |

B

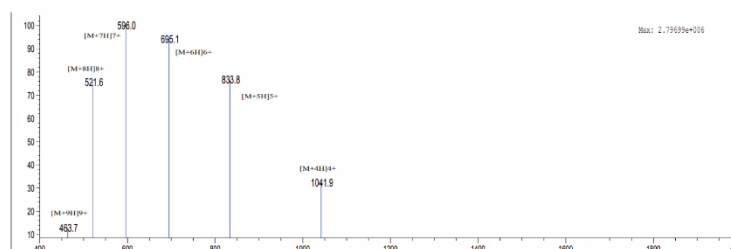

**Supplementary Figure 1.** High performance liquid chromatogram (HPLC) and mass spectra (MS) of cathelicidin-DM. (A) HPLC, retention time and peak area information of synthetic polypeptide cathelicidin-DM, the purity of cathelicidin-DM was >95%; (B) The molecular mass of cathelicidin-DM is 4163.97.
